# Supplementary material for: A novel Long-noncoding RNA LncZFAS1 prevents MPP+-induced neuroinflammation through MIB1 activation
Source: Research Square preprint supplement (doi:10.21203/rs.3.rs-770278/v1), 2021-08-02
Supplement: Supplementary file 1 [file ed22e652a7ac78b9bb808ead.docx]

.
